# Supplementary material for: Developmental Changes in the in Vitro Activated Regenerative Activity of Primitive Mammary Epithelial Cells
Source: PLoS Biol. 2013 Aug 13;11(8):e1001630. doi: 10.1371/journal.pbio.1001630 (PMC3742452; doi:10.1371/journal.pbio.1001630)
Supplement: Table S2 — LDA of the MRU frequency in different adult mammary basal and CD61+ luminal subsets. Data pooled from two experiments. (PDF) [file pbio.1001630.s004.pdf]

**Table S2.**

| <b>Use of<br/>E/P pellet</b> | <b>Fraction</b>                                                              | <b>Cell<br/>dose</b> | <b>Positive fat<br/>pads/total</b> | <b>MRU frequency<br/>(95% CI)</b> |
|------------------------------|------------------------------------------------------------------------------|----------------------|------------------------------------|-----------------------------------|
| <b>+</b>                     | EpCAM <sup>+</sup> CD49f <sup>+</sup><br>(Basal)                             | 250                  | 3/5                                | 1/290                             |
|                              |                                                                              | 50                   | 1/6                                | (1/100 – 1/780)                   |
|                              |                                                                              | 10                   | 0/5                                |                                   |
| <b>+</b>                     | EpCAM <sup>++</sup> CD49f <sup>low/-</sup><br>CD61 <sup>+</sup><br>(Luminal) | 5,000                | 3/7                                | 1/8,900<br>(1/2,800 - 1/28,000)   |
